# Supplementary material for: Drought Reduces Release of Plant Matter Into Dissolved Organic Matter Potentially Restraining Ecosystem Recovery
Source: Frontiers journal article supplement (doi:10.3389/fsoil.2022.904259), 2022-06-14
Supplement: Data_Sheet_1.zip [file Data_Sheet_1.zip]

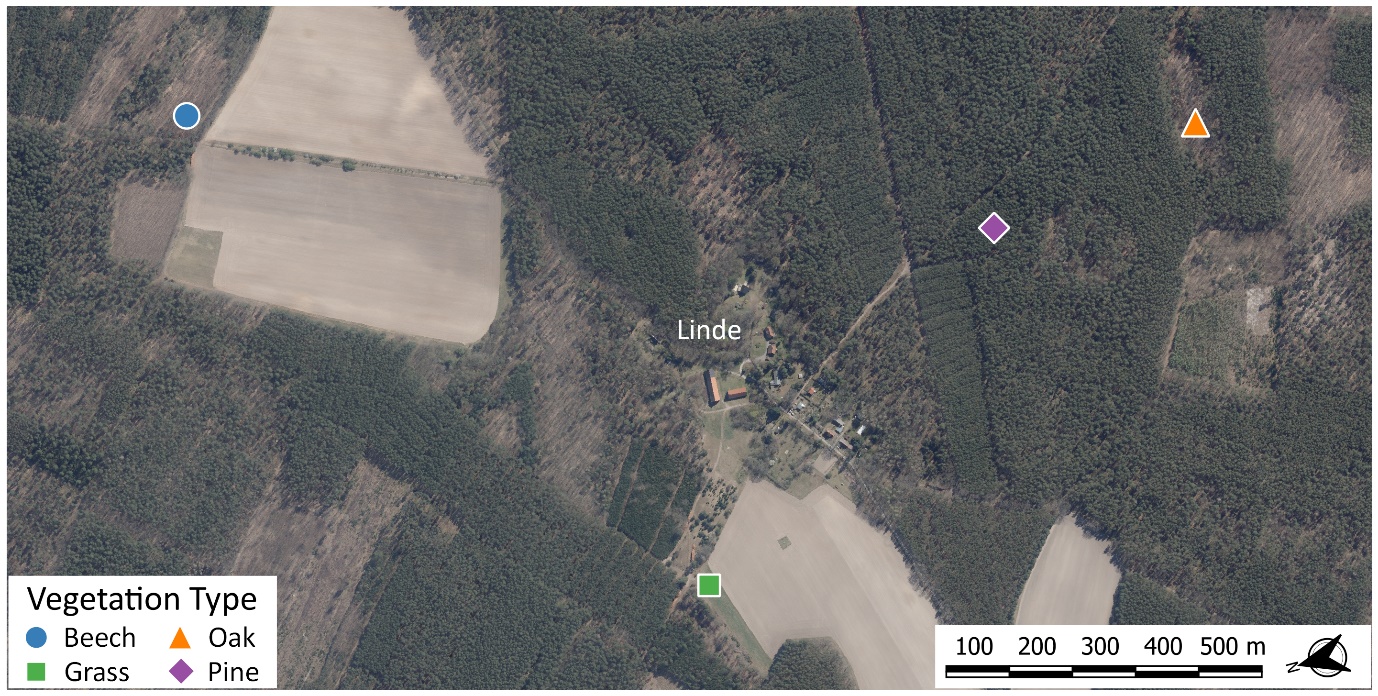


Figure S2: Map of the study site and sampling locations run by the Zwillingberg-Tietz Foundation (Map basis: © GeoBasis-DE/LGB [2020], dl-de/by-2-0).
