# Supplementary material for: Drought Reduces Release of Plant Matter Into Dissolved Organic Matter Potentially Restraining Ecosystem Recovery
Source: Frontiers journal article supplement (doi:10.3389/fsoil.2022.904259), 2022-06-14
Supplement: Table_4.docx [file Table_4.docx]

*Table S4: Average and standard deviation of litter layer depth (n=3), grassland had no litter. pH values were taken from a previous study* (26) *and show the pH between the surface and 28 cm depth.*

| Location | Litter layer thickness (cm) | pH |
| --- | --- | --- |
| Pine | 11 +/- 1.5 | 4.1 |
| Beech | 5.7 +/- 2.1 | 4.2 |
| Oak | 1.5 +/- 0.5 | 4.5 |
| Grassland | - | 4.8 |
