# Supplementary material for: Drought Reduces Release of Plant Matter Into Dissolved Organic Matter Potentially Restraining Ecosystem Recovery
Source: Frontiers journal article supplement (doi:10.3389/fsoil.2022.904259), 2022-06-14
Supplement: Table_5.docx [file Table_5.docx]

Table S5: Weighted mean of chemical characteristics of DOM. Days since rewetting refers to the number of days after the point at which samples could be collected for that well. Number of assigned peaks refers to the number of peaks in the mass spectrum that were assigned a sum formula

| Vegetation type | Depth (cm) | Sampling Well Identifier | Days since rewetting | *m*/*z* | C/N | AI(mod) | H/C | O/C | Number of assigned peaks |
| --- | --- | --- | --- | --- | --- | --- | --- | --- | --- |
| Beech | 5 | 1 | 1 | 331 | 48.6 | 0.400 | 1.06 | 0.442 | 5908 |
| Beech | 10 | 1 | 1 | 354 | 57.3 | 0.379 | 1.08 | 0.440 | 6251 |
| Beech | 5 | 2 | 1 | 326 | 60.7 | 0.405 | 1.05 | 0.448 | 5438 |
| Beech | 10 | 2 | 1 | 329 | 50.9 | 0.307 | 1.20 | 0.431 | 5930 |
| Beech | 5 | 3 | 1 | 346 | 55.6 | 0.399 | 1.06 | 0.437 | 6035 |
| Beech | 10 | 3 | 1 | 322 | 48.6 | 0.401 | 1.08 | 0.424 | 5740 |
| Beech | 10 | 1 | 14 | 345 | 54.7 | 0.391 | 1.07 | 0.441 | 6096 |
| Beech | 10 | 3 | 14 | 319 | 63.4 | 0.397 | 1.08 | 0.442 | 5201 |
| Beech | 5 | 1 | 15 | 335 | 49.9 | 0.396 | 1.07 | 0.446 | 6015 |
| Beech | 5 | 2 | 15 | 338 | 62.3 | 0.384 | 1.08 | 0.452 | 5851 |
| Beech | 10 | 2 | 56 | 337 | 61.7 | 0.401 | 1.05 | 0.453 | 5641 |
| Beech | 5 | 3 | 57 | 337 | 56.0 | 0.410 | 1.05 | 0.442 | 5709 |
| Beech | 10 | 1 | 70 | 340 | 53.0 | 0.400 | 1.06 | 0.450 | 5776 |
| Beech | 10 | 3 | 70 | 330 | 54.1 | 0.390 | 1.08 | 0.437 | 5753 |
| Beech | 5 | 1 | 71 | 339 | 49.5 | 0.411 | 1.03 | 0.463 | 5867 |
| Beech | 5 | 2 | 71 | 337 | 64.7 | 0.409 | 1.04 | 0.459 | 5444 |
| Grass | 5 | 1 | 1 | 301 | 30.5 | 0.381 | 1.13 | 0.382 | 5533 |
| Grass | 10 | 1 | 1 | 311 | 33.2 | 0.387 | 1.12 | 0.387 | 5788 |
| Grass | 5 | 2 | 1 | 326 | 32.9 | 0.377 | 1.11 | 0.421 | 6688 |
| Grass | 10 | 2 | 1 | 309 | 29.9 | 0.350 | 1.17 | 0.393 | 5800 |
| Grass | 5 | 3 | 1 | 315 | 31.4 | 0.383 | 1.12 | 0.398 | 6205 |
| Grass | 10 | 3 | 1 | 307 | 29.8 | 0.351 | 1.17 | 0.380 | 5607 |
| Grass | 10 | 1 | 6 | 320 | 33.8 | 0.387 | 1.10 | 0.408 | 6145 |
| Grass | 5 | 3 | 6 | 328 | 32.5 | 0.402 | 1.07 | 0.425 | 6586 |
| Grass | 10 | 3 | 6 | 328 | 32.5 | 0.351 | 1.15 | 0.408 | 6675 |
| Grass | 10 | 2 | 14 | 322 | 31.3 | 0.346 | 1.16 | 0.408 | 6383 |
| Grass | 10 | 1 | 20 | 327 | 34.7 | 0.386 | 1.10 | 0.415 | 6563 |
| Grass | 5 | 3 | 20 | 327 | 33.0 | 0.408 | 1.06 | 0.428 | 6627 |
| Grass | 10 | 3 | 20 | 334 | 32.7 | 0.358 | 1.13 | 0.418 | 7118 |
| Grass | 5 | 1 | 22 | 322 | 33.2 | 0.382 | 1.10 | 0.419 | 6540 |
| Grass | 5 | 2 | 22 | 337 | 33.1 | 0.394 | 1.07 | 0.434 | 7145 |
| Grass | 5 | 1 | 28 | 310 | 32.4 | 0.395 | 1.10 | 0.404 | 5692 |
| Grass | 5 | 2 | 28 | 316 | 31.4 | 0.401 | 1.08 | 0.408 | 6229 |
| Grass | 5 | 1 | 42 | 324 | 33.0 | 0.388 | 1.09 | 0.422 | 6571 |
| Grass | 5 | 2 | 42 | 327 | 32.5 | 0.397 | 1.08 | 0.421 | 6783 |
| Grass | 10 | 2 | 70 | 328 | 30.8 | 0.388 | 1.09 | 0.425 | 6855 |
| Grass | 10 | 1 | 76 | 335 | 33.9 | 0.395 | 1.07 | 0.431 | 6805 |
| Grass | 5 | 3 | 76 | 325 | 31.9 | 0.409 | 1.06 | 0.429 | 6473 |
| Grass | 10 | 3 | 76 | 332 | 30.6 | 0.376 | 1.10 | 0.431 | 6824 |
| Grass | 5 | 1 | 98 | 331 | 32.4 | 0.404 | 1.06 | 0.436 | 6759 |
| Grass | 5 | 2 | 98 | 330 | 32.4 | 0.410 | 1.06 | 0.421 | 6706 |
| Oak | 5 | 1 | 1 | 314 | 48.6 | 0.383 | 1.12 | 0.397 | 5139 |
| Oak | 10 | 1 | 1 | 333 | 47.7 | 0.346 | 1.15 | 0.426 | 5830 |
| Oak | 5 | 2 | 1 | 336 | 39.9 | 0.383 | 1.09 | 0.433 | 6397 |
| Oak | 10 | 2 | 1 | 338 | 42.9 | 0.371 | 1.11 | 0.433 | 6512 |
| Oak | 5 | 3 | 1 | 331 | 43.2 | 0.341 | 1.17 | 0.406 | 6039 |
| Oak | 10 | 3 | 1 | 321 | 39.3 | 0.373 | 1.13 | 0.394 | 5792 |
| Oak | 5 | 1 | 6 | 311 | 47.1 | 0.383 | 1.12 | 0.401 | 5125 |
| Oak | 5 | 3 | 6 | 326 | 40.2 | 0.358 | 1.15 | 0.398 | 5964 |
| Oak | 10 | 3 | 14 | 337 | 52.0 | 0.390 | 1.08 | 0.442 | 6035 |
| Oak | 5 | 2 | 15 | 340 | 42.0 | 0.380 | 1.09 | 0.435 | 6543 |
| Oak | 5 | 1 | 20 | 336 | 47.8 | 0.363 | 1.13 | 0.424 | 6390 |
| Oak | 5 | 3 | 20 | 342 | 41.3 | 0.362 | 1.13 | 0.423 | 6627 |
| Oak | 10 | 1 | 56 | 341 | 47.9 | 0.352 | 1.13 | 0.433 | 6412 |
| Oak | 10 | 2 | 56 | 329 | 61.7 | 0.320 | 1.18 | 0.434 | 5782 |
| Oak | 10 | 3 | 70 | 340 | 43.4 | 0.385 | 1.09 | 0.426 | 6285 |
| Oak | 5 | 2 | 71 | 343 | 43.7 | 0.401 | 1.06 | 0.438 | 5921 |
| Oak | 5 | 1 | 76 | 345 | 48.2 | 0.373 | 1.10 | 0.437 | 6568 |
| Oak | 5 | 3 | 76 | 325 | 40.6 | 0.373 | 1.13 | 0.407 | 6102 |
| Pine | 5 | 1 | 1 | 335 | 78.5 | 0.358 | 1.13 | 0.436 | 5594 |
| Pine | 10 | 1 | 1 | 331 | 88.0 | 0.358 | 1.14 | 0.427 | 5343 |
| Pine | 5 | 2 | 1 | 338 | 79.2 | 0.365 | 1.12 | 0.441 | 5728 |
| Pine | 10 | 2 | 1 | 326 | 77.1 | 0.357 | 1.15 | 0.417 | 5416 |
| Pine | 5 | 3 | 1 | 339 | 68.9 | 0.357 | 1.13 | 0.438 | 5901 |
| Pine | 10 | 3 | 1 | 333 | 66.4 | 0.359 | 1.13 | 0.437 | 5693 |
| Pine | 10 | 1 | 6 | 324 | 88.7 | 0.368 | 1.13 | 0.422 | 5050 |
| Pine | 5 | 2 | 6 | 321 | 77.4 | 0.364 | 1.14 | 0.418 | 5173 |
| Pine | 10 | 3 | 6 | 318 | 64.3 | 0.369 | 1.13 | 0.416 | 5284 |
| Pine | 10 | 1 | 20 | 336 | 92.4 | 0.337 | 1.18 | 0.409 | 5463 |
| Pine | 5 | 2 | 20 | 334 | 81.3 | 0.362 | 1.13 | 0.428 | 5453 |
| Pine | 10 | 3 | 20 | 333 | 70.1 | 0.368 | 1.12 | 0.428 | 5653 |
| Pine | 5 | 2 | 24 | 346 | 82.2 | 0.373 | 1.10 | 0.440 | 5891 |
| Pine | 10 | 2 | 28 | 340 | 79.7 | 0.360 | 1.12 | 0.438 | 5970 |
| Pine | 10 | 1 | 34 | 327 | 90.4 | 0.359 | 1.14 | 0.423 | 5166 |
| Pine | 10 | 3 | 34 | 334 | 72.5 | 0.369 | 1.12 | 0.429 | 5615 |
| Pine | 5 | 1 | 43 | 329 | 84.4 | 0.366 | 1.13 | 0.416 | 5150 |
| Pine | 5 | 2 | 66 | 331 | 82.7 | 0.373 | 1.12 | 0.427 | 5206 |
| Pine | 10 | 1 | 76 | 326 | 90.9 | 0.370 | 1.12 | 0.426 | 4941 |
| Pine | 10 | 3 | 76 | 336 | 71.9 | 0.368 | 1.12 | 0.432 | 5631 |
